1  
2  
3  
4  
5  
6  
7  
8  
9  
10  
11  
12  
13  
14  
15  
16  
17  
18  
19  
20  
21  
22  
23  
24  
25

# Lipidomic and Ultrastructural Characterization of Cell Envelope of *Staphylococcus aureus* Grown in the Presence of Human Serum

Running title: Effect of serum on *S. aureus* lipids and cell envelope

Kelly M. Hines<sup>a, b</sup>, Gloria Alvarado<sup>c</sup>, Xi Chen<sup>d</sup>, Craig Gatto<sup>c</sup>, Antje Pokorny<sup>e</sup>, Francis Alonzo III<sup>d</sup>, Brian J. Wilkinson<sup>c</sup>, and Libin Xu<sup>a</sup>

<sup>a</sup> Department of Medicinal Chemistry, University of Washington, Seattle, Washington, 98195, USA.

<sup>b</sup> Department of Chemistry, University of Georgia, Athens, Georgia, 30606, USA.

<sup>c</sup> School of Biological Sciences, Illinois State University, Normal, Illinois, 61790, USA.

<sup>d</sup> Department of Microbiology and Immunology, Stritch School of Medicine, Loyola University Chicago, Maywood, Illinois, 60153, USA

<sup>e</sup> Department of Chemistry and Biochemistry, University of North Carolina Wilmington, Wilmington, North Carolina, 28403, USA.

Address correspondence to Brian J. Wilkinson at [bjwilkin@ilstu.edu](mailto:bjwilkin@ilstu.edu) or Libin Xu at [libinxu@uw.edu](mailto:libinxu@uw.edu).

26 **ABSTRACT**

27 *Staphylococcus aureus* can incorporate exogenous straight-chain unsaturated and  
28 saturated fatty acids (SCUFAs and SCFAs, respectively) to replace some of the normally  
29 biosynthesized branched-chain fatty acids and SCFAs. In this study, the impact of human serum  
30 on the *S. aureus* lipidome and cell envelope structure was comprehensively characterized. When  
31 grown in the presence of 20% human serum, typical human serum lipids, such as cholesterol,  
32 sphingomyelin, phosphatidylethanolamines, and phosphatidylcholines, were present in the total  
33 lipid extracts. Mass spectrometry showed that SCUFAs were incorporated into all major *S.*  
34 *aureus* lipid classes, *i.e.*, phosphatidylglycerols, lysyl-phosphatidylglycerols, cardiolipins, and  
35 diglucosyldiacylglycerols. Heat-killed *S. aureus* retained much fewer serum lipids and failed to  
36 incorporate SCUFAs, suggesting that association and incorporation of serum lipids with *S.*  
37 *aureus* requires a living or non-denatured cell. Cytoplasmic membranes isolated from  
38 lysostaphin-produced protoplasts of serum-grown cells retained serum lipids, but washing cells  
39 with Triton X-100 removed most of them. Furthermore, electron microscopy studies showed that  
40 serum-grown cells had thicker cell envelopes and associated material on the surface, which was  
41 partially removed by Triton X-100 washing. To investigate which serum lipids were  
42 preferentially hydrolyzed by *S. aureus* lipases for incorporation, we incubated individual serum  
43 lipid classes with *S. aureus* and found that cholesteryl esters (CEs) and triglycerides (TGs) are  
44 the major donors of the incorporated fatty acids. Further experiments using purified Geh lipase  
45 confirmed CEs and TGs being the substrates of this enzyme. Thus, growth in the presence of  
46 serum altered the nature of the cell surface with implications for interactions with the host.

47 **IMPORTANCE**

48           Comprehensive lipidomics of *S. aureus* grown in the presence of human serum suggests  
49 human serum lipids can associate with the cell envelope without being truly integrated into the  
50 lipid membrane. However, fatty acids-derived from human serum lipids, including unsaturated  
51 fatty acids, can be incorporated into lipid classes that can be biosynthesized by *S. aureus* itself.  
52 Cholesteryl esters and triglycerides are found to be the major source of incorporated fatty acids  
53 upon hydrolysis by lipases. These findings have significant implications for the nature of the *S.*  
54 *aureus* cell surface when grown *in vivo*. Changes in phospholipid and glycolipid abundances and  
55 fatty acid composition could affect membrane biophysics and function and the activity of  
56 membrane-targeting antimicrobials. Finally, the association of serum lipids with the cell envelope  
57 has implications for the physicochemical nature of the cell surface and its interaction with host  
58 defense systems.

59 **KEYWORDS**

60           Lipidomics, human serum lipids, fatty acid incorporation, lipid association, cell envelope  
61 structure

62

63

64

65

66

67

68

69

70

## 71 INTRODUCTION

72 *Staphylococcus aureus* is a major bacterial pathogen of great versatility capable of  
73 infecting most organs and tissues in the body. Treatment of *S. aureus* infections is challenging due  
74 to the development of resistance to multiple antibiotics. Mechanistic studies of *S. aureus*  
75 pathogenesis have been an area of active investigation for several decades, but there is still a need  
76 to understand the metabolic and structural properties of the pathogen *in vivo*, which are likely to  
77 be different from those when grown *in vitro*. In order for a pathogenic bacterium to cause an  
78 infection, it must utilize nutrients available in the infection site for replication (1). In a 1960 paper  
79 entitled “The host as a growth medium”, E.D. Garber proposed that understanding the physiology  
80 of the bacterium at the infection site was of fundamental importance (2). In recent years, several  
81 studies have reported that *ex vivo* growth of *S. aureus* in body fluids such as blood, ocular fluids,  
82 and nasal secretions, has profound impact on the characteristics of the organism and genes required  
83 for growth in these environments (3-5).

84 One striking example of differences between *S. aureus* cells grown in conventional  
85 artificial laboratory media versus cells grown in the presence of complex host biological materials  
86 is in the fatty acid composition of the lipids of the organism. Branched-chain fatty acids (BCFAs)  
87 and straight-chain saturated fatty acids (SCFAs) comprise the entirety of the fatty acid composition  
88 of the organism in cells grown in laboratory media (6, 7). However, it has been increasingly  
89 recognized that host fatty acids, including straight-chain unsaturated fatty acids (SCUFAs), are  
90 utilized by pathogens and incorporated directly into phospholipid molecules, thereby saving the  
91 energy and carbon costs of *de novo* fatty acid biosynthesis by the type II fatty acid synthesis  
92 (FASII) pathway (8, 9). In *S. aureus*, the fatty acids are predominantly found ester-linked in the

93 polar lipids of the organism, with major phospholipid species being phosphatidylglycerol (PG),  
94 lysyl-phosphatidylglycerol (LysylPG), and cardiolipin (CL), and major glycolipid species being  
95 diglucosyldiacylglycerol (DGDG) and monoglucosyldiacylglycerol (MGDG) (7, 10, 11).

96 It is generally considered that *S. aureus* is unable to biosynthesize SCUFAs, and cells  
97 grown in the presence of serum (6), liver extract (12), and human low-density lipoprotein (LDL)  
98 and egg yolk LDL (13) have been shown to contain significant amounts of SCUFAs in their fatty  
99 acid profiles. In addition, free fatty acids are incorporated into phospholipids from medium  
100 supplemented with them (14, 15). Mass spectrometry (MS) analysis suggests that PG 33:1 is a  
101 major phospholipid when *S. aureus* is grown in the presence of LDL, which is likely made up of  
102 C18:1<sup>Δ9</sup> (oleic acid) at position *sn*-1 and anteiso C15:0 at position *sn*-2 based on MS fragmentation  
103 (13, 15). The major source of lipids in human serum is from LDL particles that contain cholesterol  
104 esters, unesterified cholesterol, triglycerides, and phospholipids (16) (Fig. 1). *S. aureus* secretes at  
105 least two lipases, *S. aureus* lipase 1 (Sal1) and glycerol ester hydrolase (Geh) (17-19), that release  
106 fatty acids from lipids found in serum (6), and LDL (13). These free fatty acids are then  
107 incorporated into *S. aureus* phospholipids and glycolipids through the FakA/B and PlsXY systems  
108 (15, 20), with or without further elongation via the type II fatty acid synthesis (FASII) system (Fig.  
109 1). The two-component fatty acid kinase system (FakA/B) produces fatty acyl-phosphate via FakA  
110 that phosphorylates fatty acids bound to FakB1 or FakB2 binding proteins, which have preferential  
111 specificities for SCFAs and SCUFAs, respectively (21). The resulting fatty acyl-phosphate is then  
112 incorporated into phospholipids via PlsXY.

113 However, despite previous work on utilization of exogenous fatty acids by *S. aureus*,  
114 several major questions remain. First, comprehensive lipidomic changes in the presence of  
115 exogenous lipids have not been characterized as previous studies focus on total fatty acid

116 composition and only PGs. Second, the specific lipid classes in LDL or serum that serve as the  
117 donors of fatty acids have not been identified. Third, whether intact human serum lipids can be  
118 incorporated into the *S. aureus* membrane has not been investigated. Fourth, structural changes to  
119 the cell envelope when *S. aureus* was grown in the presence of serum have not been characterized.  
120 To answer these questions, we grew *S. aureus* in Tryptic Soy Broth (TSB) supplemented with 20%  
121 human serum and carried out comprehensive lipidomic and electron microscopic analysis of these  
122 cells. Growth of *S. aureus* in serum has the advantage of being able to mimic *in vivo* growth (22).  
123 Oogai *et al.* have shown increased expression of multiple virulence factors in *S. aureus* grown in  
124 serum (23). Supplementation of medium with blood or blood products for antimicrobial  
125 susceptibility testing of fastidious pathogens is a common practice (24, 25). The lipid composition  
126 of *S. aureus* has an impact on the interaction of the organism with the host's defense systems (26,  
127 27).

128 We demonstrated that serum-derived SCUFAs are clearly incorporated into all classes of  
129 lipids found in *S. aureus*, among which total cardiolipin levels are drastically increased when  
130 grown in the presence of serum. Interestingly, we found that serum lipids are associated with the  
131 cell envelope, which were not removed by washing with 0.9% NaCl but were removed with Triton  
132 X-100. Electron microscopy studies showed overall thickened cell envelope and loosely associated  
133 materials on the surface that were partially removable by Triton X-100. Growth in the presence of  
134 individual lipid classes indicated that cholesteryl esters and triglycerides are the major donors of  
135 the fatty acids, which is supported by studies using recombinantly expressed Geh. These findings  
136 have implications for the biological and surface properties of the organism growing *in vivo*.

## 137 RESULTS

138           ***S. aureus* grown in serum retains serum lipids.** The total extractable lipids from 1 liter of  
139 0.9% NaCl washed cells represented about 4.6% of the dry weight of the cell, consistent with  
140 expectations (28). However, we found that total extractable lipids more than doubled (10.2%)  
141 when the cells were grown in the presence of 20% serum. Cells grown in the presence and absence  
142 of serum were subjected to comprehensive lipidomic analysis using hydrophilic interaction liquid  
143 chromatography-ion mobility-mass spectrometry (HILIC-IM-MS) (11, 29). The major lipid  
144 species observed in *S. aureus* grown in TSB included DGDGs, PGs, plasmalogen PGs (pPGs), and  
145 LysylPGs, as shown in the IM-extraction ion chromatogram (IM-XIC) in Fig. 2a. The retention  
146 time at which CLs are typically observed is noted in Fig. 2a, but CLs were below the detection  
147 limit for *S. aureus* grown in TSB (data not shown). Each class of lipids contained fully saturated  
148 fatty acids with 31 to 35 total carbons, with the species containing 33 total carbons as the most  
149 abundant species across all classes of diacyl glycerolipids (Fig. 3).

150           When *S. aureus* was grown in TSB supplemented with 20% human serum (TSB+Serum),  
151 the lipid profile, as shown in Fig. 2b, contained a mixture of the typical *S. aureus* lipid classes and  
152 lipids that are abundant in human serum (see Fig. S1 for lipid profile of clean TSB+Serum). The  
153 glycerophospholipids phosphatidylcholine (PC) and phosphatidylethanolamine (PE) are not  
154 produced by *S. aureus*, nor are sphingomyelins (SMs) and cholesterol (Chol). Rather, these lipids  
155 were retained by *S. aureus* from the culture through the harvesting and washing procedures.

156           ***S. aureus* grown in serum incorporates SCUFAs.** The panels of Fig. 3 present the  
157 abundances of individual lipid species found in TSB only and TSB+Serum-grown *S. aureus*.  
158 Although the levels of LysylPGs (Fig. 3c) were elevated overall in the TSB+Serum condition, little  
159 to no differences were observed between TSB and TSB+Serum-grown *S. aureus* for the major  
160 fully-saturated species of DGDGs (Fig. 3a) and PGs (Fig. 3b) synthesized by *S. aureus*. However,

161 *S. aureus* grown in TSB+Serum contained species of all major lipid classes with unsaturated fatty  
162 acids (i.e., 32:1, 33:1, 34:1, and 35:1) that were absent from *S. aureus* grown in TSB only. Specific  
163 fatty acid compositions were obtained by tandem MS (MS/MS) experiments as discussed below.

164 As odd-numbered carbon fatty acids are not typically observed in human serum, the  
165 occurrence of lipids with odd numbers of total carbons and one degree of unsaturation (i.e., 33:1  
166 and 35:1) strongly indicates the incorporation of a serum-derived unsaturated fatty acid into the  
167 lipids of *S. aureus*. The presence of such fatty acyl compositions in the DGDG, LysylPG, and CL  
168 species, which are not observed in human serum (see Fig. S1B), further strengthens the evidence  
169 for this incorporation.

170 Although CLs were not detected in *S. aureus* grown in TSB only, CLs with one to three  
171 degrees of unsaturation were present in the lipid profiles of *S. aureus* grown in TSB+Serum (Fig.  
172 3d). The most abundant CL was CL 66:2 with 15:0 and 18:1 being the major fatty acids (see  
173 Supplemental Material Excel S1), which was consistent with the high abundance of PG 33:1 in the  
174 serum-grown *S. aureus*. These data indicate an enrichment of unsaturated CL species when *S.*  
175 *aureus* is grown in human serum. In contrast, no CLs were detected in the lipid profile of  
176 uninoculated TSB+Serum (see Fig. S1B).

177 Targeted MS/MS experiments were performed in negative ionization mode to confirm the  
178 fatty acid compositions of the lipid species presumed to contain SCUFAs based on *m/z*. An  
179 inventory of all the fatty acids observed for each lipid species in the data shown in Fig. 3, as well  
180 as those lipid species not shown in the figure, can be found in the Supplemental Material Excel  
181 S1. The most abundant fatty acyl composition across lipid species, containing 33 carbons and no  
182 double bonds, was determined to contain octadecanoic acid (C18:0) and pentadecanoic acid  
183 (C15:0). Based on the relative intensities of the two fatty acyl fragments, it is likely that 18:0



184 occupied the *sn-1* position on the glycerol backbone and 15:0 occupied the *sn-2* position because  
185 fatty acyl at the *sn-2* position tends to fragment more easily (30). Using this same approach, it was  
186 confirmed that the lipids with 33:1 and 33:2 fatty acyl compositions contained 15:0 with C18:1  
187 and C18:2 fatty acids, respectively, while 34:1 contained a major component with 16:0 and 18:1  
188 fatty acids and a minor component with 20:1 and 14:0.

189 **Heat-killed *S. aureus* do not incorporate SCUFAs into their lipids.** The above  
190 experiments were repeated using heat-killed *S. aureus* in order to determine whether the  
191 incorporation of SCUFAs and the retention of serum lipids were active or passive processes. Fig.  
192 4 shows that the heat-killed *S. aureus* incubated in TSB+Serum did not contain the same levels of  
193 odd-carbon lipids with a degree of unsaturation as did live *S. aureus* incubated under the same  
194 conditions. The heat-kill reduced the levels of the endogenous lipid species as well, but to a much  
195 lesser extent. Much lower amounts of serum-derived lipids, such as cholesterol, PCs, and SMs,  
196 were observed from the heat-killed *S. aureus* compared to the live *S. aureus* when both were  
197 incubated in serum-supplemented TSB. These results indicate that SCUFA incorporation is an  
198 active process, presumably via the FakAB and PlsXY systems (20), and the retention of serum  
199 lipids also requires a living or non-denatured cell.

200 **Cytoplasmic membranes isolated from TSB+Serum-grown cells retain serum lipids.**  
201 Cytoplasmic membranes were isolated from *S. aureus* grown in TSB and TSB+Serum by digestion  
202 of the cell wall using lysostaphin in hypertonic sucrose followed by osmotic lysis of the  
203 protoplasts. Lipidomics was performed on washed cytoplasmic membranes. The lipid profile of  
204 the isolated membrane from TSB-grown *S. aureus* (see Fig. S2B) was consistent with the lipid  
205 profile observed for whole *S. aureus* (Fig. 2A). The cytoplasmic membrane isolated from *S. aureus*  
206 grown in the presence of serum still retained a substantial amount of serum lipids, including PCs

207 and SMs (see Fig. S2A). The overall topography of the lipid profile was consistent with that of  
208 whole *S. aureus* cells grown in the presence of serum (Fig. 2B).

209 **Serum lipids are mostly removable by Triton X-100 washing.** The nature of the retained  
210 serum lipids was further evaluated using a more rigorous washing procedure prior to lipid  
211 extraction. In the experiments above, pellets were washed with 0.9% NaCl solution prior to lipid  
212 extraction. To test whether the serum lipids were simply associated with the surface of the  
213 bacterium, collected *S. aureus* pellets were washed first with 0.9% NaCl, followed by a second  
214 wash with the detergent Triton X-100 (1%) to remove passively associated lipid material from the  
215 growth medium. Principle components analysis (PCA) of the resulting lipidomics data, shown in  
216 Fig. 5a, reveals that the Triton X-100 wash had a greater effect on the lipid profiles of serum-  
217 grown *S. aureus* than the *S. aureus* grown in TSB only. While PC1 clearly corresponds to the  
218 differences between TSB+serum-grown and TSB-only-grown *S. aureus*, the differences due to the  
219 NaCl and Triton X-100 washes are revealed on PC2. Along PC2, the separation between NaCl  
220 versus Triton X-100 washes for TSB+Serum-grown cells is much larger than the separation  
221 between the two washing conditions for TSB-only-grown cells. The two washing techniques had  
222 no significant effect on the abundances of the natively synthesized *S. aureus* lipids nor the  
223 incorporation of serum-derived SCUFAs into *S. aureus* lipids, as shown in Fig. 5b. However, the  
224 serum-derived PCs observed when *S. aureus* was grown in serum were nearly completely  
225 eliminated by the Triton X-100 washing (Fig. 5c).

226 **Electron microscope studies reveal more cell clumping, associated surface material**  
227 **partially removable by Triton X-100, and thicker cell envelopes in serum-grown cells.**

228 Transmission and scanning electron microscopy analysis was carried out to examine the  
229 effect of serum on cell envelope structure (Fig. 6). In SEM images, *S. aureus* cells grown in the

230 presence of serum are seen clumped together compared to cells grown in TSB only, which are  
231 more dispersed (Fig. 6A). Clumping of cells grown in TSB+Serum is consistent with observations  
232 made while handling bacterial pellets, where pellets were much harder to resuspend compared to  
233 TSB only-grown cells. Additionally, serum-grown cells display a textured cell surface unlike the  
234 smooth surface seen in TSB only-grown cells. TEM analysis revealed more detailed changes to  
235 the cell wall of serum-grown cells (Fig. 6B). TSB+Serum-grown cells appear to display a thicker  
236 cell wall and large protrusions with irregular shapes on the cell surface while TSB-grown cells  
237 again display a relative smooth cell surface. Materials at the protrusions appear to be partially  
238 removed through washing with 0.1% Triton X-100, suggesting some of these materials are  
239 associated with the cell wall. Quantitative analysis of overall cell wall thickness including the  
240 protrusion support the visual conclusions (Fig. 6C). Cell walls of TSB+Serum-grown cells are  
241 thicker than those of TSB only-grown cells regardless of washing conditions although there does  
242 not appear to be a difference between NaCl and Triton X-100 washed cells.

243 ***Sources of serum FAs for incorporation into S. aureus lipids.*** Serum is a complex mixture  
244 containing several classes of lipids that includes cholesteryl esters (CEs), triglycerides (TGs), and  
245 phospholipids (16). To evaluate which of these lipids may provide fatty acid substrates for  
246 incorporation into *S. aureus* lipids, bacteria were grown in TSB supplemented with 0.1 mM of  
247 oleic acid, cholesteryl oleate and linoleate (CEs), and extracts of PEs and PCs from chicken egg  
248 in ethanol. The lipid profiles resulting from growth of *S. aureus* with free oleic acid and the  
249 cholesteryl oleate/cholesteryl linoleate mixture were highly similar, as indicated by the tight cluster  
250 of these two sample groups in the PCA plot (Fig.7A). The ethanol treatment alone appears to  
251 increase the amount of PG extracted (Fig. 7B), but the overall effect on the lipid profile was small  
252 enough that the TSB+EtOH and TSB only samples are grouped closely in the PCA along with the

253 egg PC- treated group. The treatment with the intact phospholipids PEs and PCs did not lead to  
254 any significant incorporation of SCUFAs into the lipids of *S. aureus*. The PE and PC extracts used  
255 in this study indeed contain significant amount of SCUFAs (PE: 18% 18:1 and 14% 18:2; PC: 32%  
256 18:1 and 17% 18:2), suggesting they are not readily available or not good substrates of the secreted  
257 lipases under this growth condition.

258 The dramatically increased abundance of CLs with multiple degrees of unsaturation  
259 observed in the serum-grown *S. aureus* was recapitulated with the growth of *S. aureus* in TSB  
260 supplemented with oleic acid and CEs (Fig. 7C). Oleic acid and CE supplementation also resulted  
261 in the incorporation of oleate and linoleate into the major lipid classes of *S. aureus*, including PGs,  
262 LysylPG (Fig. 7D) and DGDGs (Figure 7E). Additional targeted tandem mass spectrometry was  
263 performed to confirm the fatty acid compositions of the lipid species presented in Fig. 7 as  
264 18:2/15:0, 18:1/15:0 and 18:0/15:0, respectively (see Supplemental Material Excel S1). In a  
265 separate experiment, *S. aureus* grown in the presence of tri-oleate glyceride (TG 18:1/18:1/18:1)  
266 and tri-linoleate glyceride (TG 18:2/18:2/18:2) yielded similar results, including the high  
267 abundance of unsaturated CL species (see Fig. S3).

268 Evidence of *in vivo* elongation of oleic and linoleic acids into C20:1 and C20:2 fatty acids  
269 was also observed in *S. aureus* grown in TSB supplemented with oleic acid, CEs, and TGs. Figure  
270 S4 shows *S. aureus* PG, DGDG and LysylPG species with fatty acyl compositions of 35:0, 35:1  
271 and 35:2 from *S. aureus* grown in lipid supplemented TSB. Elevated levels of 35:1 lipid species  
272 were observed from growth in the presence of oleic acid CEs and TGs. Elevated levels of 35:2  
273 lipid species were observed in TG- and cholesteryl ester-grown *S. aureus*. Tandem MS of each  
274 lipid species individually identified the exact fatty acyl compositions for the lipids shown in Fig.  
275 S4. While the 35:0 lipid species contained 20:0 and 15:0 fatty acids, the 35:1 and 35:2 species

276 contained 15:0 with 20:1 and 20:2 fatty acids, respectively (see Supplemental Material Excel S1).  
277 As no 20:1 and 20:2 fatty acids were supplemented into the TSB, the presence of these lipid species  
278 in *S. aureus* grown in the presence of 18:1 and 18:2 fatty acyl lipids indicated that these fatty acids  
279 were elongated prior to incorporation into diacylglycerolipids.

280 While oleic acid is a free fatty acid that is readily available for uptake and incorporation,  
281 the CEs and TGs contain esterified fatty acids that must undergo hydrolysis in order to generate  
282 free fatty acids. Geh is a lipase secreted by *S. aureus* with specificity for long-chain fatty acids. To  
283 evaluate the potential of Geh to generate free fatty acids, standards of CEs, TGs, PC, and PEs  
284 containing oleic or linoleic acids were incubated with purified Geh. Fig. 8 shows the abundances  
285 of free fatty acids in the supernatants following the incubation of Geh with lipid standards. As seen  
286 in the figure, despite a consistently high background level of oleic acid, CEs, PC, PE, and TG  
287 containing oleic acid yielded levels of free oleic acid higher than the background level taken from  
288 lipids that did not contain oleic acid. On the other hand, higher levels of free linoleic acid were  
289 only observed from incubation of Geh with CE, PC, and TG containing linoleic acid. The  
290 observation of PCs and PEs being substrates of Geh *in vitro*, but not donors of fatty acids *in vivo*,  
291 may be due to the different incubation conditions with the former being in 1x PBS with 10%  
292 isopropanol while the latter being in TSB with less than 1% ethanol.

293

## 294 **DISCUSSION**

### 295 **Increased overall lipid content in *S. aureus* grown in the presence of human serum.**

296 In 1971, Rédei et al. reported total extractable lipids comprised 20% of the dry weight of the  
297 organism grown in broth supplemented with 20% human serum (31). In this study, we found that  
298 the total extractable lipids of serum-grown *S. aureus* more than doubled (10.2% vs. 4.6%)

299 compared to cells grown in TSB alone. This large increase in lipid content in the presence of  
300 human serum suggest host-derived lipids could be associated with or incorporated into *S. aureus*  
301 cell envelope.

302 **Incorporation of host fatty acids into *S. aureus* lipids.** We have previously shown that  
303 SCUFAs became about 25% of the total fatty acid profile of *S. aureus* grown in 100% total bovine  
304 serum (6). Delekta et al. grew *S. aureus* in the presence of human LDL and analyzed the PG species  
305 produced under these conditions by mass spectrometry (13). PG species containing C16:1, C18:1,  
306 C18:2, and C20:1 were observed. The most abundant PG species were PG 33:1, 35:1, and 36:2.  
307 Gruss and co-workers found that addition of exogenous fatty acids promotes resistance to FASII  
308 antibiotics by *S. aureus* and selection of resistant strains that bypass FASII inhibition (12, 32). The  
309 same group showed that exogenous fatty acids could occupy both the *sn*-1 and *sn*-2 positions of  
310 PG when cells were grown in Brain Heart Infusion broth supplemented with C14:0, C16:0, and  
311 C18:1, or serum (33). This seemingly disproves the essentiality of the requirement for  
312 biosynthesized fatty acid anteiso C15:0 at the *sn*-2 position (15, 34) and undermines the viability  
313 of inhibitors of the FASII pathway as useful therapeutic agents (33). In this work, we also observed  
314 lipid species containing no C15:0, such as PG 32:1 (18:1/14:0), PG 34:1 (18:1/16:0 and 20:1/14:0),  
315 and PG 36:1 (18:1/18:0, 20:1/16:0, and 22:1/14:0), which supports the notion that anteiso C15:0  
316 is not essential. Furthermore, we observed incorporation of SCUFA into all major classes of lipids  
317 that can be synthesized by *S. aureus* (Fig. 3, 7, and S3) and that SCUFAs can undergo elongation  
318 within *S. aureus* (Fig. S4), suggesting that host-derived fatty acids can fully participate in all fatty  
319 acid (FASII) and glycerolipid metabolic pathways.

320 It is particularly worth noting that the proportion of CL of the total phospholipids was  
321 drastically increased in cells grown in the presence of serum, oleic acid, and CEs (Figures 3 and

322 7) and these CLs contain at least one SCUFA. When grown in TSB only, no CL was detected  
323 under the same condition, including CLs with fully saturated fatty acids. CL is synthesized by  
324 condensation of two molecules of PG by CL synthase enzymes (35). The *cls2* gene encodes the  
325 major CL synthase of the two in *S. aureus* (36, 37). Notably, all observed CLs in TSB+Serum-  
326 grown cells contain at least one SCUFA, suggesting that PGs containing a SCUFA are  
327 preferentially used as substrates of Cls2 over PGs containing fatty acids that are *de novo*  
328 synthesized by *S. aureus*.

329         Increased membrane CL content has been shown to be involved in decreased susceptibility  
330 to the important last-line anti-staphylococcal drug daptomycin. CL is a non-bilayer phospholipid  
331 with a small head group and four fatty acyl chains, that typically organizes in microdomains at  
332 high-curvature regions of the membrane, such as the sites of cell division and membrane fusion  
333 (9, 38-40). Daptomycin was found to attract and cluster fluid lipids in the membrane, causing  
334 membrane depolarization and delocalization of membrane proteins (41). Jiang et al. found some  
335 clinical daptomycin-resistant mutants had gain-of-function mutations in *cls2*, leading to increased  
336 CL content and decreased PG content, which then resulted in decreased daptomycin susceptibility  
337 (42). Zhang et al. have found that CL renders liposomes impermeable to daptomycin and proposed  
338 that this could be due to the prevention of flipping of the daptomycin to the inner leaflet of  
339 liposomes (43). The CL enriched membrane was also thicker than wild type membrane and resisted  
340 daptomycin lipid extraction, membrane penetration and disruption (43). In bilayer model systems,  
341 inclusion of CL has been shown to lead to increased bilayer thickness and a stiffening of the  
342 membrane, which correlates with decreases susceptibility to membrane lysis induced by helical  
343 antimicrobial peptides (44, 45). Thus, increased content of CLs in *S. aureus* grown in a host

344 environment could result in decreased susceptibility to daptomycin and other antimicrobial  
345 peptides.

346 **Association of serum lipids with the cell envelope of *S. aureus*.** TSB+Serum-grown *S.*  
347 *aureus* cells retain all major serum lipids, but these lipids are mostly removable by washing with  
348 Triton X-100. Furthermore, electron microscope images reveal that serum-grown cells have  
349 thicker cell envelopes and associated materials on their surfaces that can be partially removed by  
350 Triton X-100 washing. These observations suggest that serum lipids are associated with the cell  
351 wall, either directly as liposomes through hydrogen-bonding between the polar lipid headgroup  
352 and the cell wall or mediated by serum proteins, instead of being truly incorporated into the cell  
353 membrane. Association of serum lipids with the cell significantly decreased in heat-killed cells,  
354 suggesting the cell envelope must not be denatured for efficient association of the serum lipids.  
355 When cytoplasmic membranes were isolated from lysostaphin-induced protoplasts from serum-  
356 grown cells, the total lipid profile was very similar to that of NaCl-washed intact cells grown in  
357 TSB+Serum medium. The fact that lysostaphin-induced protoplasts, but not Triton X-100-treated  
358 cells, retain all serum lipids suggest that there is a secondary process in lysostaphin-treated cells  
359 through which the serum lipids are incorporated into the membrane.

360 The incorporation of serum lipids to cell wall-removed *S. aureus* is not surprising as this  
361 phenomenon has been observed in *S. aureus* L-forms. Bacterial L-forms are derived from typical  
362 bacteria, often through treatment with cell wall-active antibiotics, and lack an organized cell wall,  
363 yet they can proliferate in suitable media (46). Supplementation of medium with serum is often  
364 used to grow L-forms. Interestingly, cholesterol, cholesteryl esters, and triglycerides (all serum  
365 lipids) have been reported to be a component of the lipids of *S. aureus* L-forms although the content  
366 of PCs, PEs, and SMs was not examined (47). Nishiyama and Yamaguchi reported electron



367 microscopic detection of complexes between the sterol-specific antibiotic filipin and cholesterol  
368 in the membrane of staphylococcal L-forms (48). Thus, the presence of cholesterol in L-forms is  
369 a precedent for our finding of this mammalian serum lipid in *S. aureus* cells and in their  
370 membranes. Interestingly, L-forms were also reported to have double the CL content of parental  
371 bacterial forms (47).

372 We cannot completely exclude the possibility that serum lipids, likely as small liposome  
373 vesicles, could migrate through the cell wall and directly interact with the membrane. Lee et al.  
374 show that extracellular vesicles produced from the cytoplasmic membrane of *S. aureus* can  
375 traverse the cell wall (49). Extracellular vesicles, which are delimited by a lipid bilayer and cannot  
376 replicate, are naturally released from the cells by many different organisms (50), including *S.*  
377 *aureus*. Coelho et al. found that the composition of extracellular vesicles from the gram-positive  
378 bacterial pathogen *Listeria monocytogenes*, grown in Brain Heart Infusion broth supplemented  
379 with 10% bovine fetal serum, were enriched in PE, sphingolipids and triacylglycerols (51).  
380 Although it is possible that serum lipids can cross the cell wall in the other direction and insert into  
381 the membrane, the fact that Triton X-100 can effectively remove these lipids make this hypothesis  
382 less likely.

383 **Cell surface and interaction with host defense systems.** Incorporation of SCUFAs into  
384 *S. aureus* membrane has been shown to impact host-pathogen interactions. Lopez et al. showed  
385 that incorporation of *cis* SCUFAs from the host into membrane phospholipids activated the type  
386 VII secretion system for multiple virulence factors (26). On the other hand, Nguyen et al.  
387 demonstrated that SCUFAs C16:1, C18:1, and C18:2 were taken up, elongated, and incorporated  
388 into membrane phospholipids and the lipid moiety of lipoproteins. This led to an increased  
389 recognition of the *S. aureus* by the innate immune system dependent on Toll-like receptor 2 (27).

390 However, it is also plausible the association of human serum-derived lipids with the cell envelope  
391 could change the response by the host innate immune system, *i.e.*, the host material-decorated cells  
392 could allow them to escape the immune system. Detailed composition, in addition to lipids, of the  
393 associated materials and their effect on host immune system would be worth further investigation.

394

## 395 **MATERIALS AND METHODS**

396 **Bacterial strain and growth conditions.** The studies were carried out using *S. aureus*  
397 strain JE2 derived from strain LAC USA300, a prominent community-acquired methicillin-  
398 resistant *S. aureus* strain responsible for aggressive cutaneous and systemic infections in the USA  
399 (52). The strain was grown in Tryptic Soy Broth (TSB) (BD Difco; Franklin Lakes, NJ), at 37°C  
400 with shaking (200 rpm) in 50 mL medium in 250 mL Erlenmeyer flasks. For growth in the presence  
401 of serum, TSB was supplemented with 20% heat-treated pooled gender human serum (BioIVT;  
402 Hicksville, NY). Cultures were harvested by centrifugation (9,800 x g at 4°C for 5 min) and were  
403 washed twice by resuspension and centrifugation in cold 0.9% NaCl. For treatment with lipid  
404 standards TSB was supplemented with oleic acid (Sigma-Aldrich; St. Louis, MO), cholesteryl  
405 oleate (Sigma-Aldrich; St. Louis, MO), cholesteryl linoleate (Sigma-Aldrich; St. Louis, MO),  
406 triglycerides (NuChek Prep. Inc., Elysian, MN), phosphatidylcholine egg extract (Avanti Polar  
407 Lipids; Alabaster, AB), and phosphatidylethanolamine egg extract (Avanti Polar Lipids;  
408 Alabaster, AB) in ethanol to a final concentration of 0.1 mM in TSB. For washing experiments,  
409 cells were initially washed twice in 0.9% NaCl followed by two washes in 0.1% vol/vol Triton X-  
410 100. After Triton X-100 washing the cells were washed twice with 0.9% NaCl.

411 **Heat-killed cells.** Cells were grown in 50 mL TSB to an OD<sub>600</sub> of 1.0 and harvested and  
412 washed once in 0.9% NaCl as described above. Washed cells were resuspended in 1 mL 0.9%

413 NaCl and incubated in a 56°C water bath for 30 mins. The heat-killed cells were then added to 50  
414 mL of sterile TSB or TSB supplemented with 20% human serum and incubated at 37°C with  
415 shaking (200 rpm) for one hour. Cells were harvested and washed twice in 0.9% NaCl before being  
416 subjected to lipidomic analysis.

417 **Isolation of cytoplasmic membranes.** Cytoplasmic membranes were isolated from  
418 lysostaphin-induced protoplasts as described by Wilkinson et al. (53). Briefly, washed cells were  
419 resuspended in buffered hypertonic sucrose and cell walls were digested by lysostaphin treatment.  
420 The protoplasts were recovered by centrifugation and lysed by resuspension in dilute buffer.  
421 Cytoplasmic membranes were recovered by centrifugation and were washed in water.

422 **Lipidomic analysis.** Total lipids were extracted by the method of Bligh and Dyer (54).  
423 Lipid extracts were dried under nitrogen and dissolved in 1:1 chloroform-methanol. Small aliquots  
424 were diluted into 2:1 acetonitrile/methanol for analysis. Extracts were analyzed by hydrophilic  
425 interaction chromatography (HILIC) coupled to an ion mobility-mass spectrometer (Synapt G2-Si  
426 IM-MS; Waters Corp., Milford, MA) in positive and negative modes (11, 29). Data analysis was  
427 performed with Progenesis QI (Nonlinear Dynamics; Waters Corp., Milford, MA) and lipid  
428 abundances were normalized to bacterial dry weight (11).

429 **Transmission and scanning electron microscopy.** Samples were prepared for  
430 transmission electron microscopy (TEM) using a modified high pressure freezing/freeze  
431 substitution (HPF/FS) method as described by Hall et al. (55). Pelleted bacteria were loaded into  
432 metal specimen carriers (2 mm diameter aluminum) coated with 1-hexadecene and frozen in an  
433 HPM 010 high pressure freezer. Freeze substitution was performed in 2% OsO<sub>4</sub> (Electron  
434 Microscopy Sciences; Hatfield, PA) and 0.1% uranyl acetate (Polysciences; Warrington, PA) in  
435 2% H<sub>2</sub>O and 98% acetone in an FS-8500 freeze substitution system. Samples warmed and washed

436 as described (55). Samples were infiltrated with 1:1 Polybed812 (Polysciences) resin:acetone for  
437 24 hours, 2:1 resin:acetone for 36 hours, 100% resin for 24 hours, and then changed to fresh resin  
438 for three days. All infiltration steps were conducted on an orbital shaker at room temperature.  
439 Samples were then submerged into embedding molds with resin and hardener and baked at 60°C  
440 for two days. 50-70 nm sections were collected using a PowerTome PC ultramicrotome with a  
441 diamond knife and collected onto carbon coated copper slot grids. Sections were imaged with a  
442 Phillips CM200 TEM. For scanning electron microscopy (SEM), samples were prepared using  
443 liquid cultures by gently passing through and embedding in a 0.2 µm filter (Nuclepore). Filter-  
444 embedded bacterial samples were fixed in 2% paraformaldehyde and 2.5% glutaraldehyde in 0.1  
445 M sodium Cacodylate buffer at pH 7.4 for four hours on ice before being washed in buffer for 10  
446 minutes with shaking. Samples were dehydrated in increasing ethanol concentrations three times  
447 with 10 minutes of shaking each time until reaching 100% ethanol. Samples were then dried in a  
448 Tousimis 931 critical point drier in 100% ethanol and coated with 6 nm gold-palladium. Images  
449 were collected on a FEI Quanta FEG 450 ESEM.

450 **Expression and purification of Geh-6xHis in *E. coli* lysY/I<sup>q</sup>.** C-terminally 6xHis-tagged  
451 *S.aureus* Geh was expressed in *E. coli* lysY/I<sup>q</sup> and purified as described previously (56).

#### 452 **Incubation of lipids with Geh-6xHis.**

453 Individual lipid standards (1 mM stock in isopropanol; PCs and PEs from Avanti Polar Lipids,  
454 CEs from Sigma-Aldrich Inc., and TGs from NuChek Prep.) were added to Geh-6xHis in 50 µL  
455 1XPBS, resulting in a 100 µM:2 µM lipid:Geh-6xHis ratio. The reaction was incubated at 37°C  
456 for 2 hours and then stopped by freezing at -80°C. Lipids were extracted and analyzed as described  
457 above.

## 458 **ACKNOWLEDGEMENTS**

459 This grant was supported by NIH grants 1R21 AI13535 to BJW and CG, R01AI136979 to LX,  
460 and R01AI120994 to FA. FA also acknowledges support from Burroughs Wellcome Fund  
461 Investigators in the Pathogenesis of Infectious Disease Award. The authors would like to thank  
462 Ursula Reuter-Carlson, Scott Robinson, and the Microscopy Suite in The Imaging Technology  
463 Group at the University of Illinois Urbana-Champaign for assistance in TEM/SEM image  
464 collection.

465

## 466 **REFERENCES**

- 467 1. Brown SA, Palmer KL, Whiteley M. 2008. Revisiting the host as a growth medium. *Nat*  
468 *Rev Microbiol* 6:657-666.
- 469 2. Garber ED. 1960. The host as a growth medium. *Annals of the New York Academy of*  
470 *Sciences* 88:1187-1194.
- 471 3. Massey RC, Dissanayeke SR, Cameron B, Ferguson D, Foster TJ, Peacock SJ. 2002.  
472 Functional blocking of *Staphylococcus aureus* adhesins following growth in ex vivo  
473 media. *Infect Immun* 70:5339-45.
- 474 4. Krismer B, Liebeke M, Janek D, Nega M, Rautenberg M, Hornig G, Unger C,  
475 Weidenmaier C, Lalk M, Peschel A. 2014. Nutrient limitation governs *Staphylococcus*  
476 *aureus* metabolism and niche adaptation in the human nose. *PLoS Pathog* 10:e1003862.
- 477 5. Valentino MD, Foulston L, Sadaka A, Kos VN, Villet RA, Santa Maria J, Jr., Lazinski  
478 DW, Camilli A, Walker S, Hooper DC, Gilmore MS. 2014. Genes contributing to  
479 *Staphylococcus aureus* fitness in abscess- and infection-related ecologies. *mBio*  
480 5:e01729-14.

- 481 6. Sen S, Sirobhusanam S, Johnson SR, Song Y, Tefft R, Gatto C, Wilkinson BJ. 2016.  
482 Growth-Environment Dependent Modulation of *Staphylococcus aureus* Branched-Chain  
483 to Straight-Chain Fatty Acid Ratio and Incorporation of Unsaturated Fatty Acids. *PLoS*  
484 *One* 11:e0165300.
- 485 7. O’Leary WM, Wilkinson SG. 1988. Gram-positive bacteria, p 117–201. *In* Ratledge C,  
486 Wilkinson SG (ed), *Microbial Lipids*. Academic Press, London.
- 487 8. Yao J, Rock CO. 2017. Exogenous fatty acid metabolism in bacteria. *Biochimie* 141:30-  
488 39.
- 489 9. Fozo EM, Rucks EA. 2016. The Making and Taking of Lipids: The Role of Bacterial  
490 Lipid Synthesis and the Harnessing of Host Lipids in Bacterial Pathogenesis. *Adv Microb*  
491 *Physiol* 69:51-155.
- 492 10. Kuhn S, Slavetinsky CJ, Peschel A. 2015. Synthesis and function of phospholipids in  
493 *Staphylococcus aureus*. *Int J Med Microbiol* 305:196-202.
- 494 11. Hines KM, Waalkes A, Penewit K, Holmes EA, Salipante SJ, Werth BJ, Xu L. 2017.  
495 Characterization of the Mechanisms of Daptomycin Resistance among Gram-Positive  
496 Bacterial Pathogens by Multidimensional Lipidomics. *mSphere* 2:e00492-17.
- 497 12. Morvan C, Halpern D, Kenanian G, Hays C, Anba-Mondoloni J, Brinster S, Kennedy S,  
498 Trieu-Cuot P, Poyart C, Lamberet G, Gloux K, Gruss A. 2016. Environmental fatty acids  
499 enable emergence of infectious *Staphylococcus aureus* resistant to FASII-targeted  
500 antimicrobials. *Nat Commun* 7:12944.
- 501 13. Delekta PC, Shook JC, Lydic TA, Mulks MH, Hammer ND. 2018. *Staphylococcus*  
502 *aureus* Utilizes Host-Derived Lipoprotein Particles as Sources of Fatty Acids. *Journal of*  
503 *bacteriology* 200:e00728-17.

- 504 14. Altenbern RA. 1977. Cerulenin-inhibited cells of *Staphylococcus aureus* resume growth  
505 when supplemented with either a saturated or an unsaturated fatty acid. *Antimicrobial*  
506 *agents and chemotherapy* 11:574-576.
- 507 15. Parsons JB, Frank MW, Jackson P, Subramanian C, Rock CO. 2014. Incorporation of  
508 extracellular fatty acids by a fatty acid kinase-dependent pathway in *Staphylococcus*  
509 *aureus*. *Mol Microbiol* 92:234-45.
- 510 16. Quehenberger O, Armando AM, Brown AH, Milne SB, Myers DS, Merrill AH,  
511 Bandyopadhyay S, Jones KN, Kelly S, Shaner RL, Sullards CM, Wang E, Murphy RC,  
512 Barkley RM, Leiker TJ, Raetz CR, Guan Z, Laird GM, Six DA, Russell DW, McDonald  
513 JG, Subramaniam S, Fahy E, Dennis EA. 2010. Lipidomics reveals a remarkable  
514 diversity of lipids in human plasma. *J Lipid Res* 51:3299-305.
- 515 17. Rollof J, Hedstrom SA, Nilsson-Ehle P. 1987. Purification and characterization of a  
516 lipase from *Staphylococcus aureus*. *Biochim Biophys Acta* 921:364-9.
- 517 18. Cadieux B, Vijayakumaran V, Bernards MA, McGavin MJ, Heinrichs DE. 2014. Role of  
518 lipase from community-associated methicillin-resistant *Staphylococcus aureus* strain  
519 USA300 in hydrolyzing triglycerides into growth-inhibitory free fatty acids. *Journal of*  
520 *bacteriology* 196:4044-4056.
- 521 19. Simons JW, Adams H, Cox RC, Dekker N, Gotz F, Slotboom AJ, Verheij HM. 1996. The  
522 lipase from *Staphylococcus aureus*. Expression in *Escherichia coli*, large-scale  
523 purification and comparison of substrate specificity to *Staphylococcus hyicus* lipase. *Eur*  
524 *J Biochem* 242:760-9.

- 525 20. Parsons JB, Broussard TC, Bose JL, Rosch JW, Jackson P, Subramanian C, Rock CO.  
526 2014. Identification of a two-component fatty acid kinase responsible for host fatty acid  
527 incorporation by *Staphylococcus aureus*. *Proc Natl Acad Sci U S A* 111:10532-7.
- 528 21. Cuypers MG, Subramanian C, Gullett JM, Frank MW, White SW, Rock CO. 2019. Acyl-  
529 chain selectivity and physiological roles of *Staphylococcus aureus* fatty acid-binding  
530 proteins. *J Biol Chem* 294:38-49.
- 531 22. Wiltshire MD, Foster SJ. 2001. Identification and analysis of *Staphylococcus aureus*  
532 components expressed by a model system of growth in serum. *Infect Immun* 69:5198-  
533 202.
- 534 23. Oogai Y, Matsuo M, Hashimoto M, Kato F, Sugai M, Komatsuzawa H. 2011. Expression  
535 of virulence factors by *Staphylococcus aureus* grown in serum. *Appl Environ Microbiol*  
536 77:8097-105.
- 537 24. Brenner VC, Sherris JC. 1972. Influence of different media and bloods on results of  
538 diffusion antibiotic susceptibility tests. *Antimicrob Agents Chemother* 1:116-22.
- 539 25. Jorgensen JH, Ferraro MJ. 2000. Antimicrobial susceptibility testing: special needs for  
540 fastidious organisms and difficult-to-detect resistance mechanisms. *Clin Infect Dis*  
541 30:799-808.
- 542 26. Lopez MS, Tan IS, Yan D, Kang J, McCreary M, Modrusan Z, Austin CD, Xu M, Brown  
543 EJ. 2017. Host-derived fatty acids activate type VII secretion in *Staphylococcus aureus*.  
544 *Proc Natl Acad Sci U S A* 114:11223-11228.
- 545 27. Nguyen MT, Hanzelmann D, Hartner T, Peschel A, Gotz F. 2016. Skin-Specific  
546 Unsaturated Fatty Acids Boost the *Staphylococcus aureus* Innate Immune Response.  
547 *Infect Immun* 84:205-15.



- 548 28. Wilkinson BJ. 1997. Biology, p 1-38. *In* Crossley KB, Archer GL (ed), The  
549 Staphylococci in Human Diseases. Church-ill Livingston, London.
- 550 29. Hines KM, Herron J, Xu LB. 2017. Assessment of altered lipid homeostasis by HILIC-  
551 ion mobility-mass spectrometry-based lipidomics. *Journal of Lipid Research* 58:809-819.
- 552 30. Pulfer M, Murphy RC. 2003. Electrospray mass spectrometry of phospholipids. *Mass*  
553 *Spectrom Rev* 22:332-64.
- 554 31. Redai I, Rethy A, Sebessi-Gonczy P, Vaczi L. 1971. Lipids in *Staphylococcus aureus* and  
555 *Escherichia coli* cultured in the presence of human serum. *Acta Microbiol Acad Sci Hung*  
556 18:297-306.
- 557 32. Gloux K, Guillemet M, Soler C, Morvan C, Halpern D, Pourcel C, Vu Thien H, Lamberet  
558 G, Gruss A. 2017. Clinical Relevance of Type II Fatty Acid Synthesis Bypass in  
559 *Staphylococcus aureus*. *Antimicrob Agents Chemother* 61.
- 560 33. Kénanian G, Morvan C, Weckel A, Pathania A, Anba-Mondoloni J, Halpern D, Gaillard  
561 M, Solgadi A, Dupont L, Henry C, Poyart C, Fouet A, Lamberet G, Gloux K, Gruss A.  
562 2019. Permissive Fatty Acid Incorporation Promotes Staphylococcal Adaptation to FASII  
563 Antibiotics in Host Environments. *Cell reports* 29:3974-3982.e4.
- 564 34. Parsons JB, Frank MW, Subramanian C, Saenkham P, Rock CO. 2011. Metabolic basis  
565 for the differential susceptibility of Gram-positive pathogens to fatty acid synthesis  
566 inhibitors. *Proc Natl Acad Sci U S A* 108:15378-83.
- 567 35. Short SA, White DC. 1972. Biosynthesis of cardiolipin from phosphatidylglycerol in  
568 *Staphylococcus aureus*. *J Bacteriol* 109:820-6.

- 569 36. Tsai M, Ohniwa RL, Kato Y, Takeshita SL, Ohta T, Saito S, Hayashi H, Morikawa K.  
570 2011. Staphylococcus aureus requires cardiolipin for survival under conditions of high  
571 salinity. BMC microbiology 11:13-13.
- 572 37. Koprivnjak T, Zhang D, Ernst CM, Peschel A, Nauseef WM, Weiss JP. 2011.  
573 Characterization of Staphylococcus aureus cardiolipin synthases 1 and 2 and their  
574 contribution to accumulation of cardiolipin in stationary phase and within phagocytes.  
575 Journal of bacteriology 193:4134-4142.
- 576 38. Lin T-Y, Weibel DB. 2016. Organization and function of anionic phospholipids in  
577 bacteria. Applied microbiology and biotechnology 100:4255-4267.
- 578 39. Matsumoto K, Kusaka J, Nishibori A, Hara H. 2006. Lipid domains in bacterial  
579 membranes. Mol Microbiol 61:1110-7.
- 580 40. Mileykovskaya E, Dowhan W. 2009. Cardiolipin membrane domains in prokaryotes and  
581 eukaryotes. Biochim Biophys Acta 1788:2084-91.
- 582 41. Muller A, Wenzel M, Strahl H, Grein F, Saaki TNV, Kohl B, Siersma T, Bandow JE,  
583 Sahl HG, Schneider T, Hamoen LW. 2016. Daptomycin inhibits cell envelope synthesis  
584 by interfering with fluid membrane microdomains. Proc Natl Acad Sci U S A 113:E7077-  
585 E7086.
- 586 42. Jiang JH, Bhuiyan MS, Shen HH, Cameron DR, Rupasinghe TWT, Wu CM, Le Brun  
587 AP, Kostoulas X, Domene C, Fulcher AJ, McConville MJ, Howden BP, Lieschke GJ,  
588 Peleg AY. 2019. Antibiotic resistance and host immune evasion in Staphylococcus  
589 aureus mediated by a metabolic adaptation. Proc Natl Acad Sci U S A 116:3722-3727.

- 590 43. Zhang T, Muraih JK, Tishbi N, Herskowitz J, Victor RL, Silverman J, Uwumarenogie S,  
591 Taylor SD, Palmer M, Mintzer E. 2014. Cardiolipin prevents membrane translocation and  
592 permeabilization by daptomycin. *J Biol Chem* 289:11584-91.
- 593 44. Hernández-Villa L, Manrique-Moreno M, Leidy C, Jemioła-Rzemińska M, Ortíz C,  
594 Strzałka K. Biophysical evaluation of cardiolipin content as a regulator of the membrane  
595 lytic effect of antimicrobial peptides. *Biophys Chem* 238:8-15
- 596 45. Boscia AL, Treece BW, Mohammadyani D, Klein-Seetharaman J, Braun AR, Wassenaar  
597 TA, Klösgen B, Tristram-Nagle S. X-ray structure, thermodynamics, elastic properties  
598 and MD simulations of cardiolipin/dimyristoylphosphatidylcholine mixed membranes.  
599 *Chem Phys Lipids* 178:1-10.
- 600 46. Williams RE. 1963. L Forms of *Staphylococcus Aureus*. *J Gen Microbiol* 33:325-34.
- 601 47. Hayami M, Okabe A, Kariyama R, Abe M, Kanemasa Y. 1979. Lipid composition of  
602 *Staphylococcus aureus* and its derived L-forms. *Microbiology and immunology* 23:435-  
603 442.
- 604 48. Nishiyama Y, Yamaguchi H. 1990. Morphological detection of filipin-sterol complexes  
605 in the cytoplasmic membrane of staphylococcal L-form. *Microbiology and immunology*  
606 34:25-34.
- 607 49. Lee EY, Choi DY, Kim DK, Kim JW, Park JO, Kim S, Kim SH, Desiderio DM, Kim  
608 YK, Kim KP, Gho YS. 2009. Gram-positive bacteria produce membrane vesicles:  
609 proteomics-based characterization of *Staphylococcus aureus*-derived membrane vesicles.  
610 *Proteomics* 9:5425-36.
- 611 50. Coelho C, Casadevall A. 2019. Answers to naysayers regarding microbial extracellular  
612 vesicles. *Biochemical Society transactions* 47:1005-1012.

- 613 51. Coelho C, Brown L, Maryam M, Vij R, Smith DFQ, Burnet MC, Kyle JE, Heyman HM,  
614 Ramirez J, Prados-Rosales R, Lauvau G, Nakayasu ES, Brady NR, Hamacher-Brady A,  
615 Coppens I, Casadevall A. 2019. *Listeria monocytogenes* virulence factors, including  
616 listeriolysin O, are secreted in biologically active extracellular vesicles. *J Biol Chem*  
617 294:1202-1217.
- 618 52. Fey PD, Endres JL, Yajjala VK, Widhelm TJ, Boissy RJ, Bose JL, Bayles KW. 2013. A  
619 genetic resource for rapid and comprehensive phenotype screening of nonessential  
620 *Staphylococcus aureus* genes. *mBio* 4:e00537-12.
- 621 53. Wilkinson BJ, Kim Y, Peterson PK, Quie PG, Michael AF. 1978. Activation of  
622 complement by cell surface components of *Staphylococcus aureus*. *Infect Immun* 20:388-  
623 92.
- 624 54. Bligh EG, Dyer WJ. 1959. A rapid method of total lipid extraction and purification. *Can J*  
625 *Biochem Physiol* 37:911-7.
- 626 55. Hall DH, Hartweg E, Nguyen KC. 2012. Modern electron microscopy methods for *C.*  
627 *elegans*. *Methods Cell Biol* 107:93-149.
- 628 56. Chen X, Alonzo F, 3rd. 2019. Bacterial lipolysis of immune-activating ligands promotes  
629 evasion of innate defenses. *Proc Natl Acad Sci U S A* 116:3764-3773.
- 630
- 631
- 632
- 633
- 634

635 FIGURES AND FIGURE LEGENDS

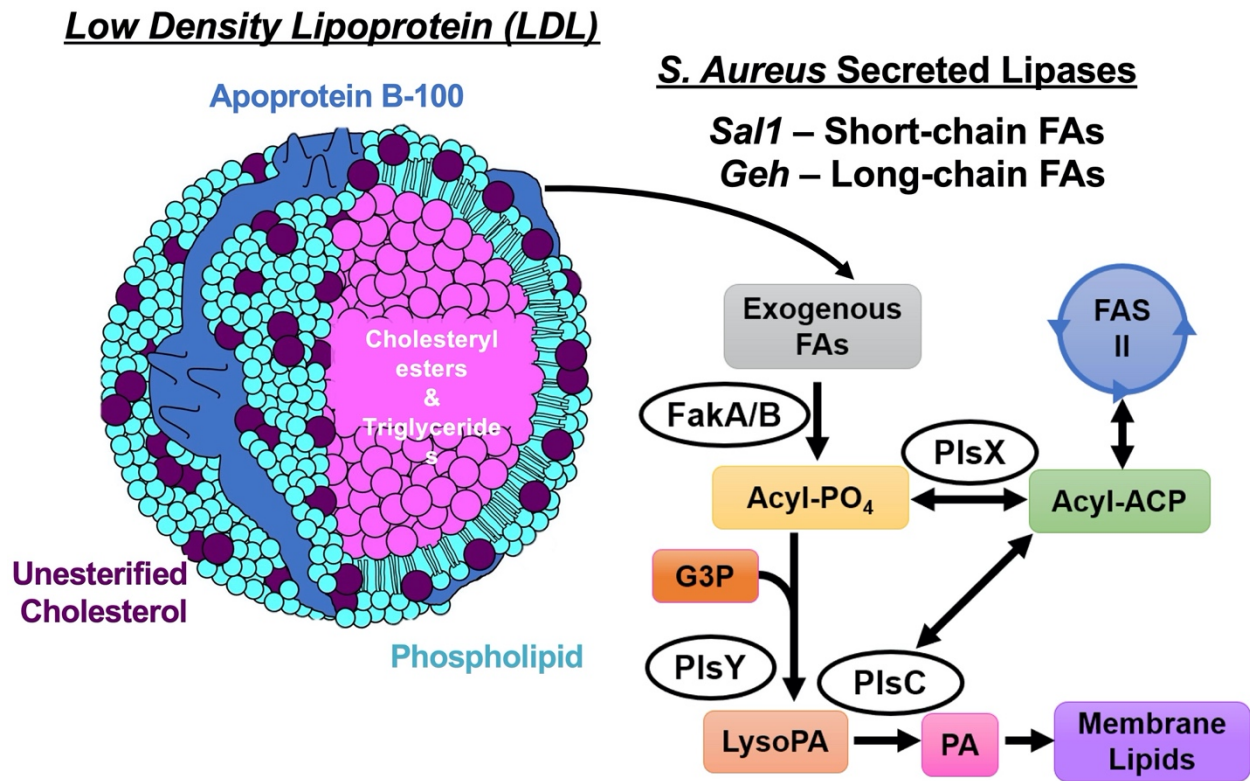

636

637 **Fig. 1.** The major source of lipids in human serum is from LDL particles that contain cholesteryl  
638 esters, unesterified cholesterol, triglycerides and phospholipids. *S. aureus* secretes at least two  
639 lipases, *Sal1* and *Geh*, that release free fatty acids from lipids found in serum and LDL. These  
640 free fatty acids can be incorporated into *S. aureus* membrane lipids through the FakA/B and  
641 PlsXY systems, with or without further elongation in type II fatty acid synthesis.

642

643

644

645

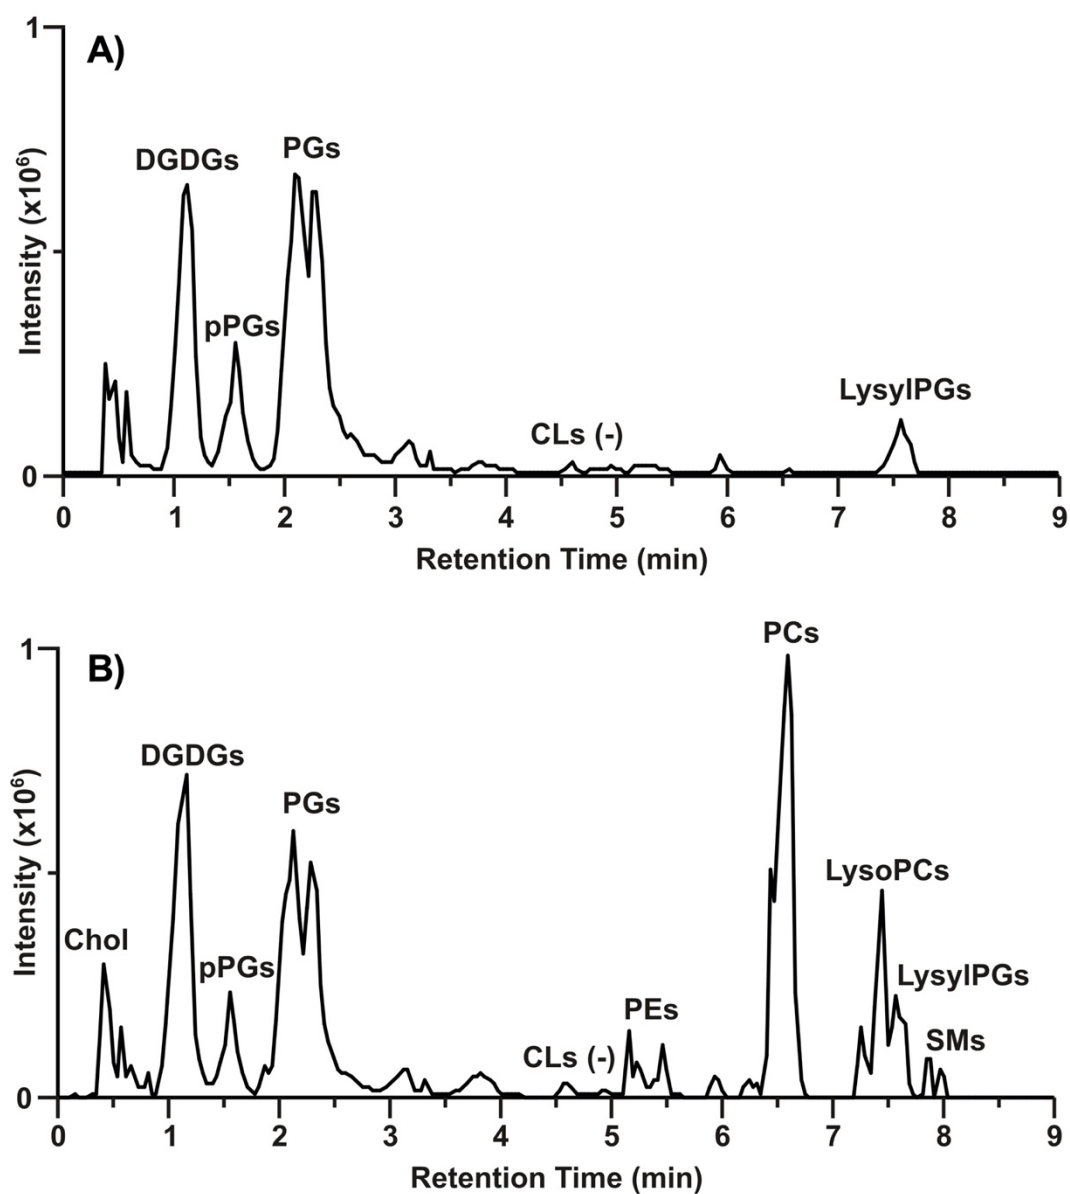

646

647 **Fig. 2.** Lipid profiles of JE2 grown in A) TBS and B) TBS containing 20% human serum. Data  
648 shown are ion mobility-extracted ion chromatograms from the positive ESI analysis.

649

650

651

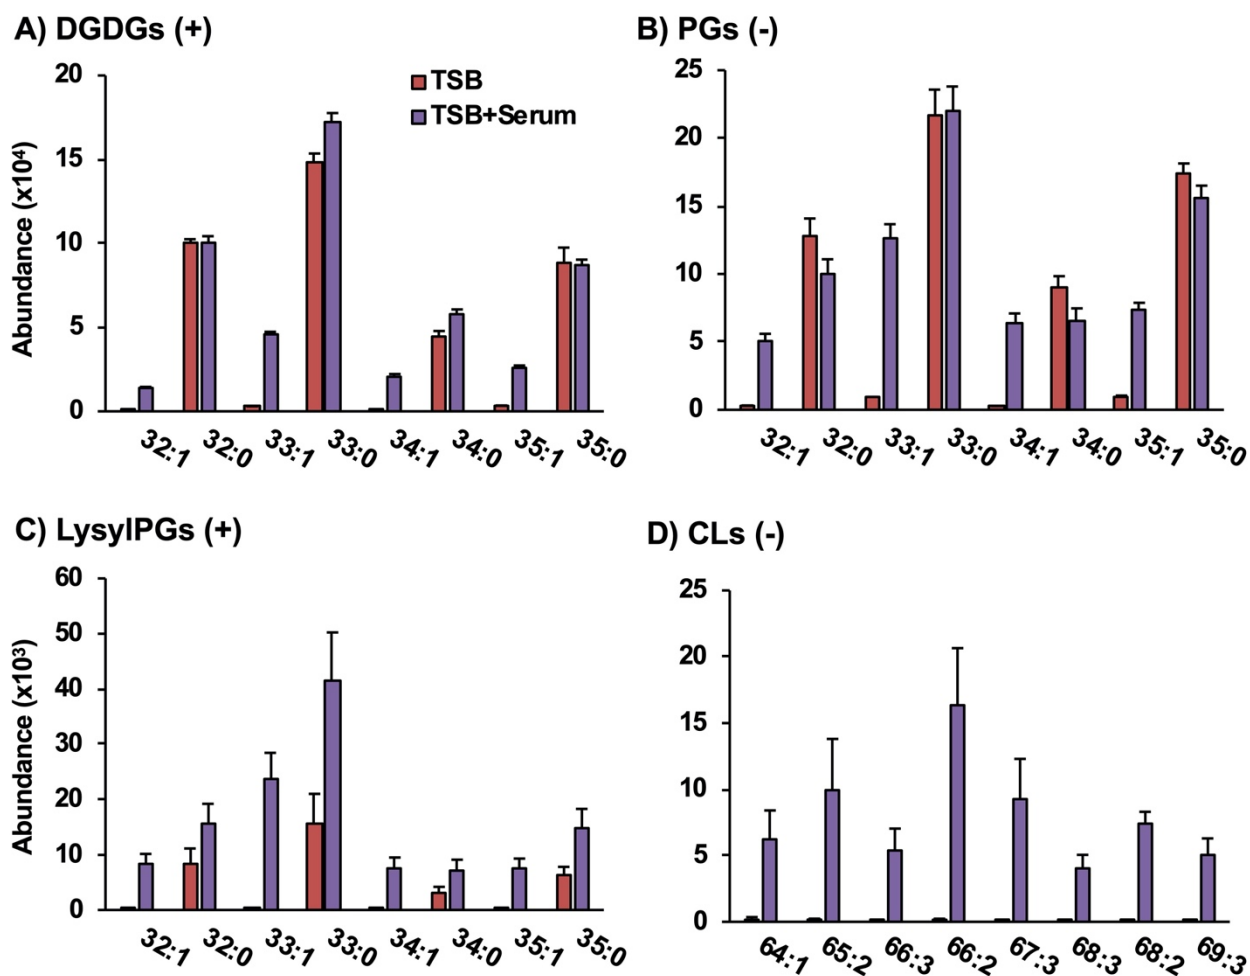

652

653 **Fig. 3.** The presence of odd-carbon lipids with unsaturation are evidence that serum-derived  
654 unsaturated fatty acids are incorporated into the A) DGDG, B) PG, C) LysylPG, and D) CL lipid  
655 classes of *S. aureus*. Parentheses indicate that data is from positive (+) and negative (-) mode  
656 ESI. N = 4 per group. Statistics and detailed fatty acid composition from MS/MS experiments  
657 can be found in Supplemental Material Excel S1.

658

659

660

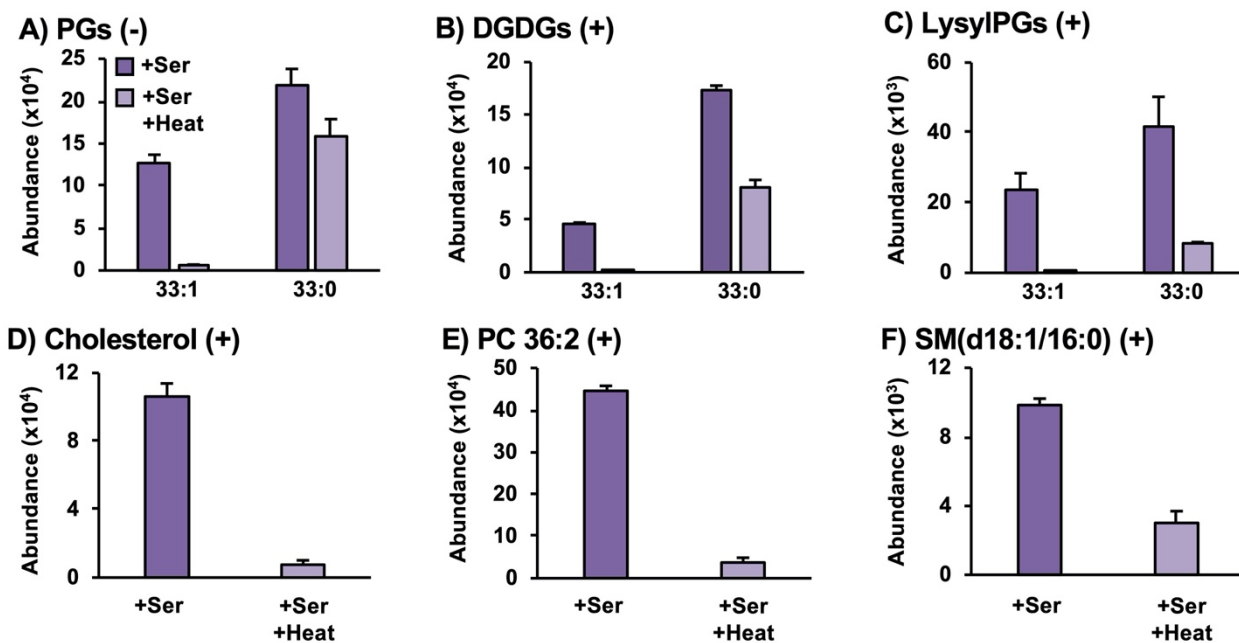

661  
662 **Fig. 4.** Heat-killed *S. aureus* lacks SCUFAs in A) PGs, B) DGDGs, and C) LysylPGs and retains  
663 less amounts of serum lipids such as D) cholesterol, E) PC 36:2 and F) SM(d18:1/16:0). N = 3  
664 per group. Statistics and detailed fatty acid composition from MS/MS experiments can be found  
665 in Supplemental Material Excel S1.

666

667

668

669

670

671

672

673



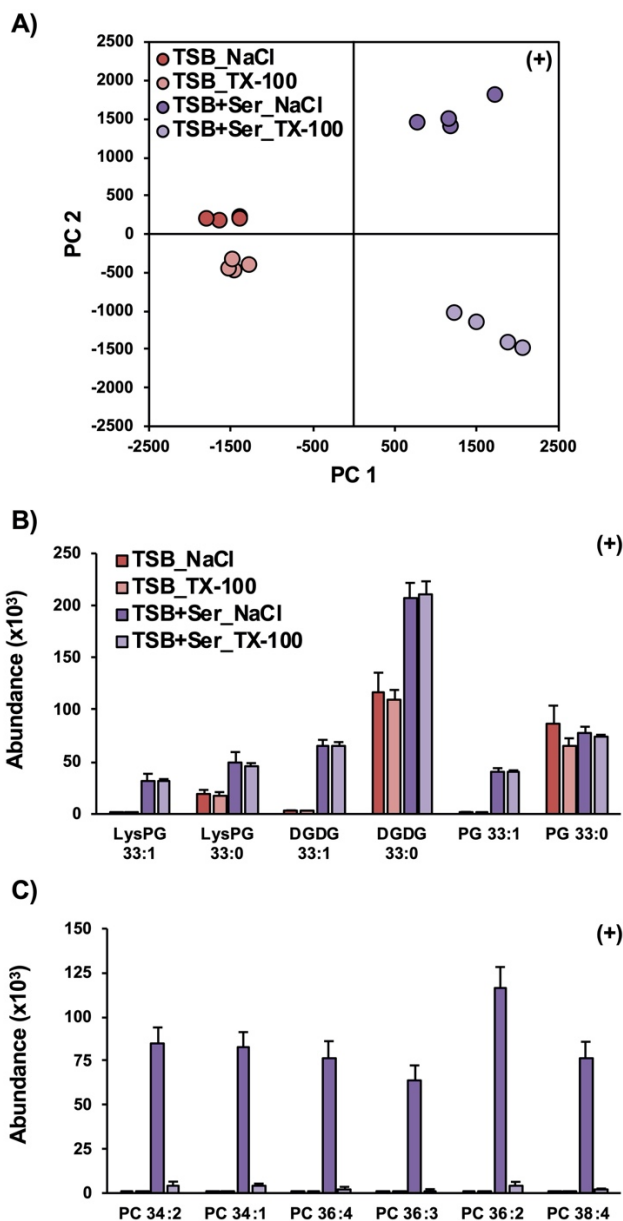

674

675 **Fig. 5.** Principal component analysis of lipidomics data (A) reveals that washing pelleted *S.*

676 *aureus* with TX-100 prior to lipid extraction alters the lipid profile of *S. aureus* grown in TSB

677 supplemented with serum but not *S. aureus* grown in TSB only. B) Washing with TX-100 has no

678 effect on the abundance of endogenous lipids or the incorporation of SCUFAs in serum-treated

679 *S. aureus*. C) Pellets from serum-grown *S. aureus* treated with TX-100 prior to lipid extraction

680 had significantly lower levels of serum lipids, such as PCs. N= 4 per group. Statistics and

681 detailed fatty acid composition from MS/MS experiments can be found in Excel S1.

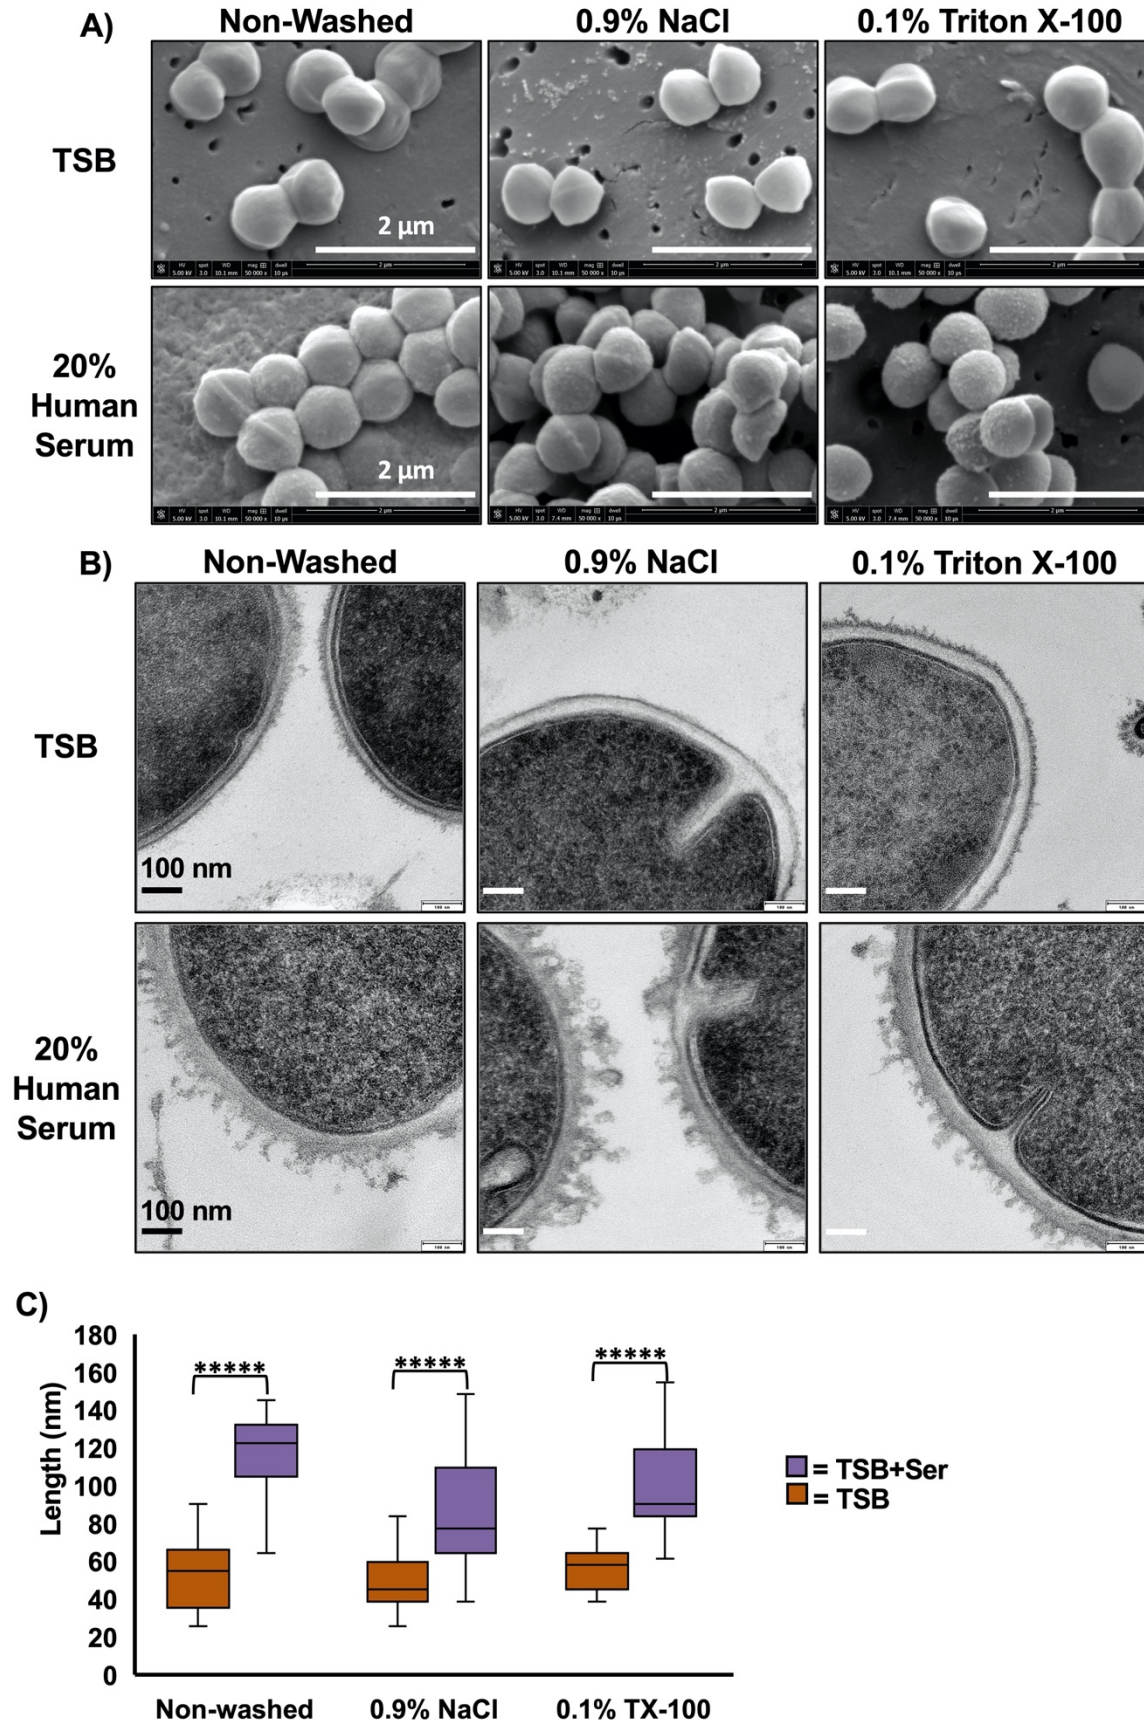

683 **Fig. 6.** Electron microscopic analysis of *S. aureus* grown with and without human serum. (A)  
684 SEM images reveal *S. aureus* grown in the presence of human serum leads to a textured cell  
685 surface compared to the smooth cell surface of TSB-grown cells. (B) TEM images reveal that  
686 cells grown in TSB+Serum display protrusions with irregular shapes, which can be partially  
687 removed with Triton X-100 washing. (C) Quantitation of cell wall thickness reveals thicker cell  
688 walls in cells grown in TSB+Serum than those grown in TSB only, but cell wall thickness does  
689 not differ between washing with 0.9% NaCl or Triton X-100.  $N \geq 21$  per group. \*\*\*\*\*,  $p < 10^{-6}$ .

690

691

692

693

694

695

696

697

698

699

700

701

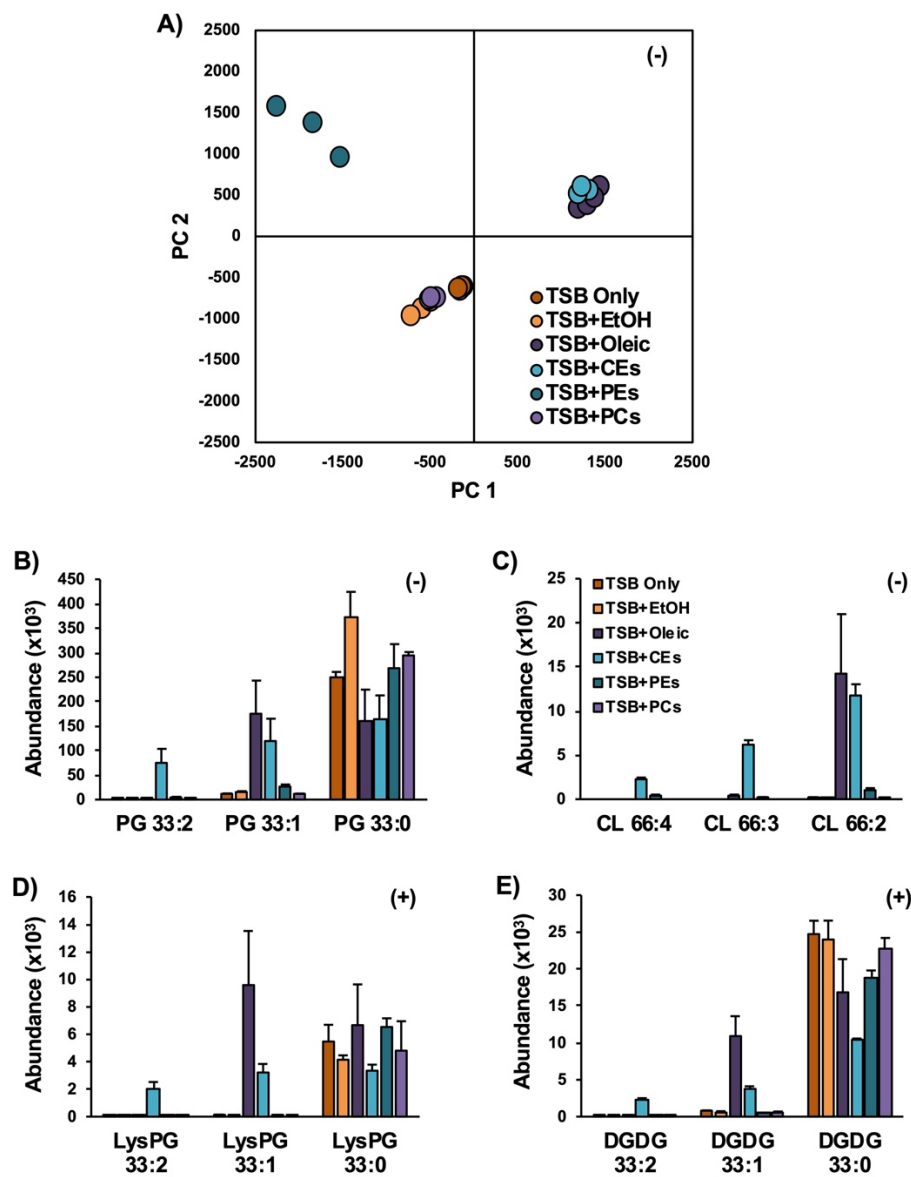

702

703 **Fig. 7.** Incubations of *S. aureus* in TSB supplemented with lipid standards. A) PCA of the  
 704 lipidomics data indicates that oleic acid and CEs, collectively, have similar effects on the lipid  
 705 profiles of *S. aureus* relative to *S. aureus* grown in neat TSB or TSB with ethanol. The oleate and  
 706 linoleate fatty acids from the oleic and CE-treated *S. aureus* are readily incorporated into B) PGs,  
 707 C) CLs, D) LysylPGs, and E) DGDGs, whereas little-to-no incorporation was observed in the PE  
 708 and PC-treated *S. aureus*. N = 3 per group. Statistics and detailed fatty acid composition from  
 709 MS/MS experiments can be found in Excel S1.

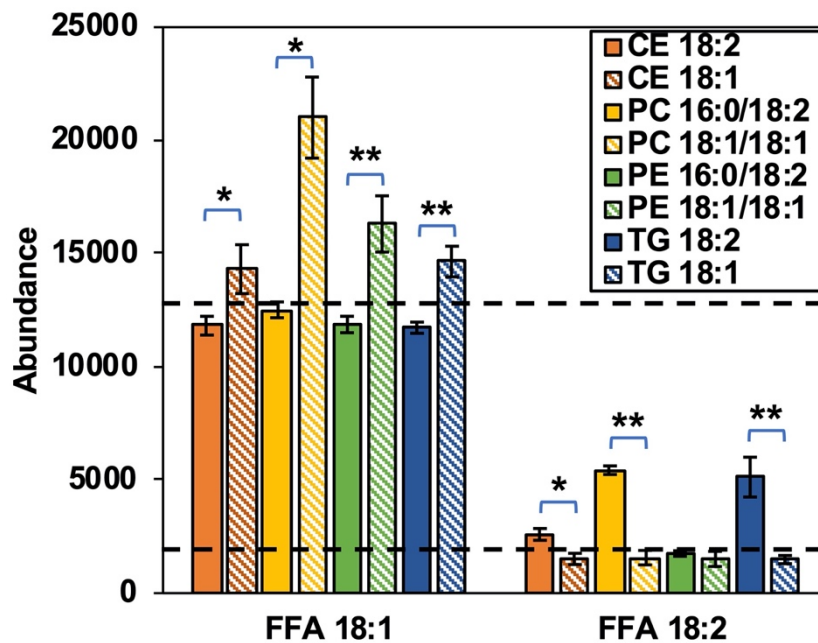

710

711 **Fig. 8.** The relative abundances of free oleic (FFA 18:1) and free linoleic (FFA 18:2) resulting  
712 from the incubation of purified Geh with cholesteryl esters, phospholipids, and triglycerides  
713 containing oleic and linoleic acids. N = 3 per group. Statistics were carried out using Student's *t*-  
714 test. \*,  $p \leq 0.05$ ; \*\*,  $p \leq 0.01$ .

715

716

717

718

719

720

721

722

## 723 LEGENDS for Supplemental Materials

724 **Fig. S1.** Lipid profiles of clean A) TSB and B) TSB supplemented with 20% human serum. Data  
725 shown are IM-XICs from positive ionization mode.

726 **Fig. S2.** Lipid profiles of isolated cytoplasmic membranes from *S. aureus* grown in A) TSB  
727 supplemented with 20% human serum and B) TSB only. Data shown are IM-XICs from negative  
728 ionization mode.

729 **Fig. S3.** Incubations of *S. aureus* in TSB supplemented with tri-oleate and tri-linoleate  
730 triglycerides (TG). Oleic (18:1) and linoleic acid (18:2) were incorporated into A) PGs, B)  
731 lysylPGs, C) DGDGs, and D) cardiolipins (CLs).

732 **Fig. S4.** Oleic and linoleic acids derived from cholesteryl esters and triglycerides can be  
733 elongated by *S. aureus*. *S. aureus* lipid species PGs (A, B), DGDGs (C, D) and LysylPGs (E, F)  
734 with 35 total carbons and one or two double bonds were observed when *S. aureus* was grown in  
735 lipid supplemented TSB. Targeted MS/MS experiments revealed these lipids contained  
736 pentadecanoic acid and eicosenoic (20:1) or eicosadienoic (20:2) acids.

737 **Excel S1.** Retention time, *m/z*, collision cross section, abundance, fold-changes, statistics, and  
738 fatty acid composition obtained from MS/MS fragmentation of lipids observed in experiments  
739 related to Figs. 3, 4, 5, 7, and S3.
